# Supplementary material
Source: Springer Nature journal article supplement (http://www.springermedizin.de/resource/supplementary/13014_2013_1057_MOESM6_ESM.pdf/9635220)

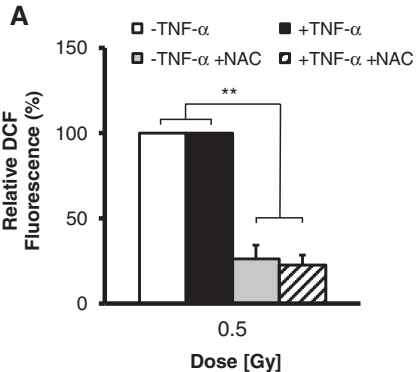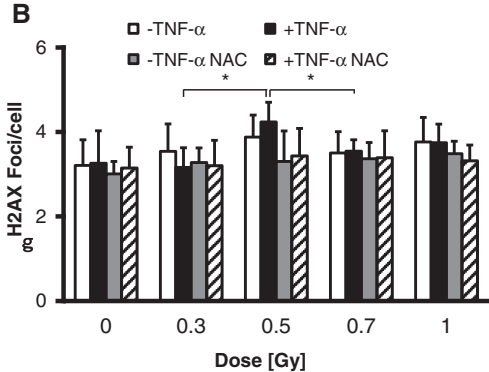

Supplement: MOESM6 [file 9635220]
